# Supplementary material
Source: publisher site journal article supplement (https://www.dovepress.com/get_supplementary_file.php?f=329883.docx)
Supplement: Supplementary file 1 [file get_supplementary_file.php]

# Supporting information

Supplementary Table 1 Baseline characteristics of patients in the PAIR study by the up-to-date definition of severe hemophilia

| Characteristic | FVIII <1%  (n=38) | All Patients  (N=44) |
| --- | --- | --- |
| Age at ITI therapy start, months, median (range) | 19.0 (4.0–320.0) | 23.5 (1.0–676.0) |
| Race, n (%) |  |  |
| White | 21 (63.6) | 29 (65.9) |
| Asian | 1 (3.0) | 1 (2.3) |
| Black | 3 (9.1) | 4 (9.1) |
| Hispanic | 3 (9.1) | 3 (6.8) |
| Other/missing | 5 (15.2) | 7 (15.9) |
| Family history of inhibitor, n (%) |  |  |
| Yes | 10 (30.3) | 11 (25.0) |
| No | 20 (60.6) | 30 (68.2) |
| Unknown | 3 (9.1) | 3 (6.8) |
| Titer, BU, median (mean, range) |  |  |
| At diagnosis | 4.8 (17.7, 0.7–173.0) | 4.9 (21.2, 0.5–173.0) |
| Peak before ITI therapya | 10.0 (38.9, 0.7–225.2) | 12.5 (43.0, 0.7–225.2) |
| Immediately before ITI therapy | 4.0 (5.6, 0–27.0) | 4.0 (8.0, 0–60.6) |

**Notes:** aIf peak titer before ITI therapy was not reported, the maximum of all titer measurements made before ITI therapy was used.

**Abbreviations:** BU, Bethesda unit; FVIII, coagulation factor VIII; ITI, immune tolerance induction; PAIR, Prospective ADVATE Immune Tolerance Induction Registry.

Supplementary Table 2 Summary of ITI therapy dosing during the PAIR study by the up-to-date definition of severe hemophilia

|  | Baseline FVIII <1%  (n=32) | Baseline FVIII ≥1%  (n=11) | Total  (N=43) |
| --- | --- | --- | --- |
| Weight-adjusted dose per infusion, IU/kg, mean (SD) | 125.4 (70.8) | 78.5 (35.5) | 156.0 (26.0) |
| Number of infusions per week, mean (median, range) | 6.1 (5.2, 0.6–14.0) | 5.8 (6.1, 2.2–11.3) | 6.0 (5.2, 0.6–14.0) |

**Notes:** aThese estimates assume patient adherence to their prescribed dosing regimen. The total column represents patients in the baseline FVIII <1% and baseline FVIII ≥1% columns.

**Abbreviations:** FVIII, coagulation factor VIII; ITI, immune tolerance induction; IU, international unit; PAIR, Prospective ADVATE Immune Tolerance Induction Registry; SD, standard deviation.

Supplementary Table 3 ITI dosage regimens utilized in the PAIR study by the up-to-date definition of severe hemophilia

| Dose in IU/kg/day, n (%) | FVIII <1%  (n=38) | | All Patients  (N=44) | |
| --- | --- | --- | --- | --- |
| **High Titera,b**  **(n=22)** | **Low Titera,c**  **(n=11)** | **High Titera,b**  **(n=29)** | **Low Titera,c**  **(n=15)** |
| ≥200 | 4 (18.2) | 0 | 4 (13.8) | 0 |
| ~131–199 | 1 (4.5) | 0 | 3 (10.3) | 0 |
| 90–130 | 15 (68.2) | 6 (54.5) | 18 (62.1) | 8 (53.3) |
| <90 | 2 (9.1) | 5 (45.5) | 4 (13.8) | 7 (46.7) |

**Notes:** aIf peak titer before ITI therapy was not reported, the maximum of all titer measurements made before ITI therapy was used. b≥5 BU. c<5 BU.

**Abbreviations:** BU, Bethesda unit; FVIII, coagulation factor VIII; ITI, immune tolerance induction; IU, international unit; PAIR, Prospective ADVATE Immune Tolerance Induction Registry.

Supplementary Table 4 Outcomes in patients who completed rAHF ITI therapy (CAS) by the up-to-date definition of severe hemophilia

| **Completers, n (%)** | **Severe Hemophiliaa (FVIII <1%)**  **(n=28)** | **Non-severe Hemophiliaa (FVIII ≥1%)**  **(n=8)** | **Total**  **(n=36)** |
| --- | --- | --- | --- |
| General success | 18 (64.3) | 3 (37.5) | 21 (58.3) |
| Partial success | 2 (7.1) | 0 (0) | 2 (5.6) |
| Failure | 4 (14.3) | 4 (50.0) | 8 (22.2) |

**Abbreviations:** CAS, completer analysis set; FVIII, coagulation factor VIII; ITI, immune tolerance induction; NA, not available; PK, pharmacokinetic; rAHF, antihemophilic factor (recombinant).

Supplementary Table 5 Summary of bleeding episodes during ITI therapy by the up-to-date definition of severe hemophilia

| Bleed episode type | Baseline FVIII <1%  (na=28) | Baseline FVIII ≥1%  (na=8) | Total  (Na=36) |
| --- | --- | --- | --- |
| Injury | 127 (20) | 29 (6) | 156 (26) |
| Spontaneous | 71 (13) | 23 (3) | 94 (16) |
| Unknown or missing | 83 (14) | 6 (3) | 89 (17) |
| Total | 281 (26) | 58 (7) | 339 (33) |

**Notes:**Numbers outside the parentheses represent the number of bleeds, and numbers inside the parentheses represent the number of unique patients. The total column represents patients in the baseline FVIII <1% and baseline FVIII ≥1% columns. aNumber of patients within baseline FVIII category.

**Abbreviations:** FVIII, coagulation factor VIII; ITI, immune tolerance induction.

## Supplementary Table 6 Independent ethic committees/institutional review boards that approved the PAIR study in accordance with local requirements

| **Country** | **Number of sites** | **Independent ethic committee/institutional review board** |
| --- | --- | --- |
| Germany | 1 | Ethikkommission der Med. Fakultät der HHU.  Düsseldorf |
| Belgium | 1 | Comité Ethique Hospitalier, Hôpital Universitaire des Enfants Reine Fabiola ou Association Hospitalière de Bruxelles. Brussel |
| Belgium | 1 | Commissie Medische Ethiek Van De Universitaire. Leuven |
| France | 5 | Comité Consultatif sur le Traitement de l’Information en matière de Recherche dans le domaine de la Santé (CCTIRS) and Commission  nationale de l’Informatique et des Libertés (CNIL) |
| Greece | 1 | Scientific Council and Ministry of Health |
| United Kingdom | 1 | South West Research Ethics Committee, Research Ethics Service, Exeter. Devon |
| Denmark | 1 | Data Protection Agency |
| Spain | 1 | Comité Ético de Investigación, Clínica De Las Islas Baleares, Consellería de Salut i Consum, Mallorca. Islas Baleares |
| Italy | 1 | Comitato Etico, A.O. di Cosenza, Cosenza |
| Italy | 1 | Ospedale Maggiore Policlinico, Mangiagalli e Regina Elena Fondazione IRCCS di Natura Pubblica Comitato Etico, Avv. Rocco Mangia  Presidente del Comitato Etico. Milan |
| Italy | 1 | Comitato Etico Indipendente, A.O. Ospedale Policlinico Consorziale. Bari |
| Italy | 1 | Comitato Etico Ospedale Careggi, Azienda Ospedaliero Universitaria Careggi. Firenze |
| Italy | 1 | Ethic Committee for Clinical Trial, Padova |
| USA | 1 | University of Arkansas for Medical Sciences, Office of Research and Sponsored Programs IRB. Little Rock, AR |
| USA | 1 | Seattle Children's Hospital IRB. Seattle, WA |
| USA | 1 | University of Texas Health Science Center at San  Antonio IRB, San Antonio, TX |
| USA | 1 | St. Vincent Hospital & Health Care Center, Inc.  Research and Research Regulatory Affairs. Indianapolis, IN |
| USA | 1 | University of Oklahoma Health Sciences Center IRB. Oklahoma City, OK |
| USA | 1 | University of California, San Francisco Committee on Human Research. San Francisco, CA |
| USA | 1 | Drexel College of Medicine IRB. Philadelphia, PA |
| USA | 1 | University of Michigan Medical School IRB. Ann Arbor, MI |
| USA | 1 | Rush University Medical Center Research and Clinical Trials Administration Office. Chicago, IL |
| Canada | 1 | Research Ethics Office. Toronto, ONT |

IRB, institutional review board.
